# Supplementary material for: Photoinduced charge separation in functional carbon–silver nanohybrids
Source: Royal Society of Chemistry journal article supplement (doi:10.1039/d2cp00668e), 2022-01-01
Supplement: d2cp00668e1.pdf [file d2cp00668e1.pdf]

# Supplementary Information File

## Photoinduced charge separation in functional carbon-silver nanohybrids

M. Reale<sup>a</sup>, S. Chandra<sup>b</sup>, G. Buscarino<sup>a,c</sup>, A. Emanuele<sup>a</sup>, M. Cannas<sup>a</sup>, O. Ikkala<sup>b</sup>, A. Sciortino<sup>\*a,c</sup>, F. Messina<sup>\*\*a,c</sup>

<sup>a</sup> Dipartimento di Fisica e Chimica – Emilio Segrè, Università degli Studi di Palermo, Via Archirafi 36, 90123 Palermo (Italy)

<sup>b</sup> Department of Applied Physics, Aalto University, P. O. Box 15100, Espoo, FI-00076, Finland

<sup>c</sup> ATeN Center – Università degli Studi di Palermo, Viale delle Scienze, Edificio 18, 90128 Palermo (Italy)

\* [alice.sciortino02@unipa.it](mailto:alice.sciortino02@unipa.it)

\*\* [fabrizio.messina@unipa.it](mailto:fabrizio.messina@unipa.it)

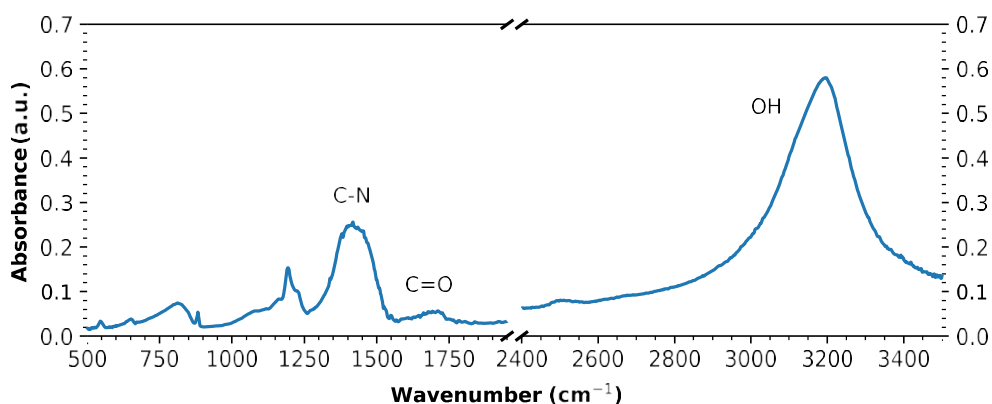

Figure S1 – ATR infrared absorption spectrum of CDs. Vibrations at  $\approx 1700\text{ cm}^{-1}$  and  $3200\text{ cm}^{-1}$  are attributed to surface carboxylic and hydroxyl groups, respectively, while the broad peak around  $1400\text{ cm}^{-1}$  is attributed to core C-N vibrations.

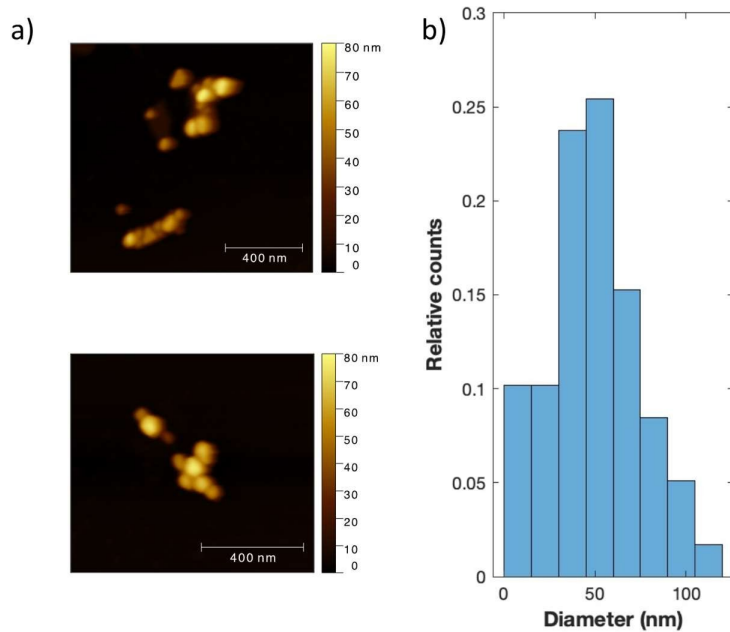

Figure S2 – (a) Representative AFM images of AgNP- sample. (b) AgNP- size distribution extracted from AFM measurements.

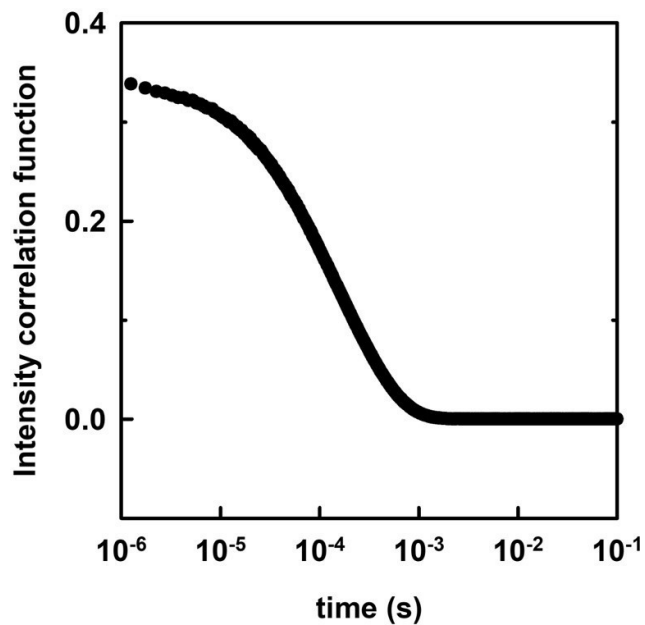

Figure S3 – Intensity correlation function for AgNP- sample obtained by DLS measurements. Data analysis revealed an average hydrodynamic radius of  $(26 \pm 3)$  nm.

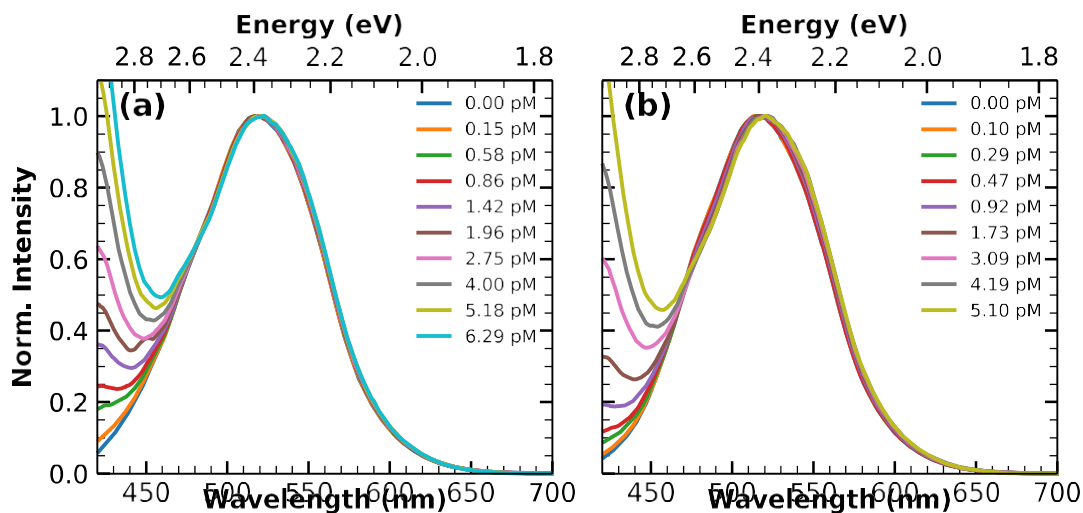

Figure S4 – Normalized photoluminescence spectra under 410 nm excitation of the CD solution in the presence of increasing amount (as indicated in the legends) of (a) AgNP- and (b) AgNP+.

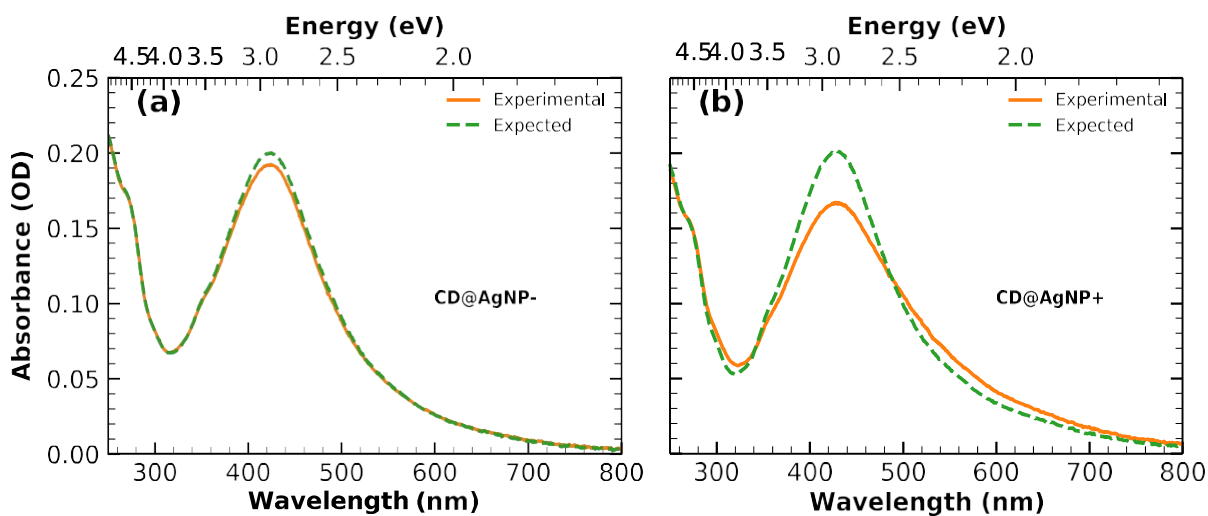

Figure S5 – The orange curves represent the experimental optical extinction spectra of mixed solutions of CD (60 nM) with (a) AgNP- (5 pM) and (b) AgNP+ (5pM). The dashed green curves represent the simple weighted sum of the experimental spectra of the two isolated constituents (i.e. no interactions).

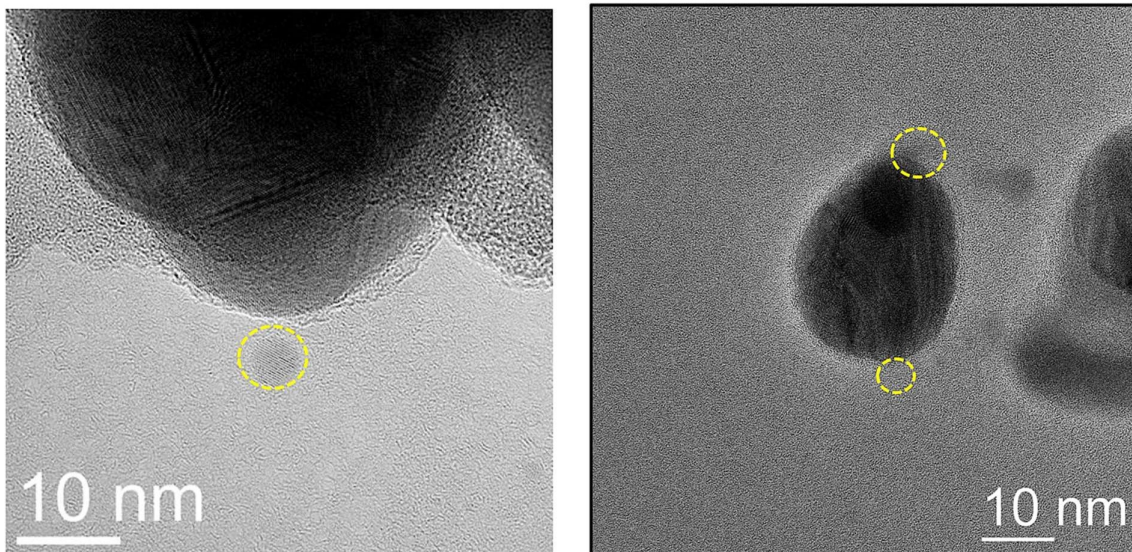

Figure S6 – HRTEM images of CD@AgNP- nanohybrids. Yellow circles highlight crystalline spots with sizes of 3-4 nm and low contrast which are due to carbon dots in close proximity to the surface of AgNPs.

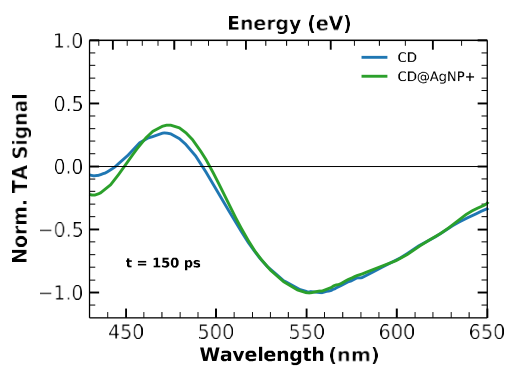

Figure S7 – Comparison of the normalized TA spectra of bare CD (blue) and CD@AgNP+ (green) recorded at 150 ps after photoexcitation at 400 nm.

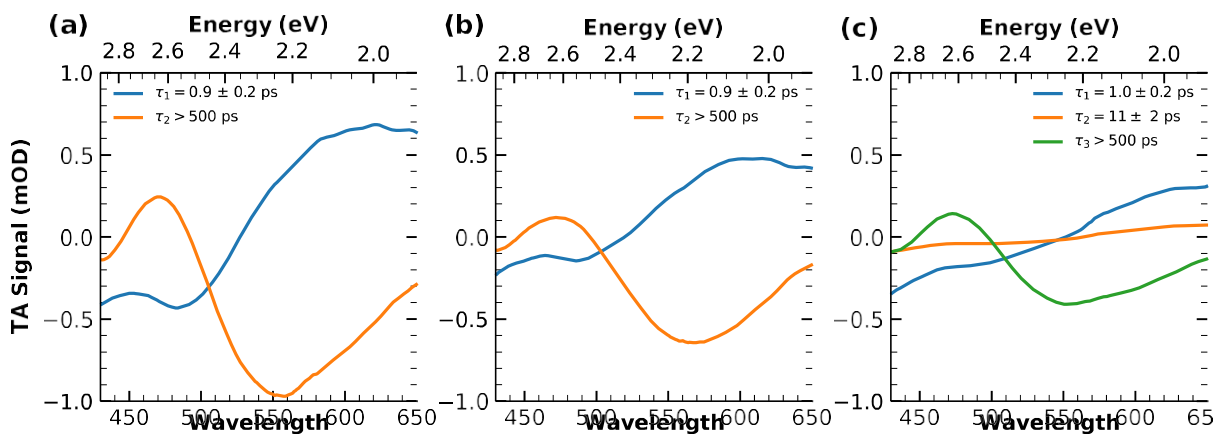

Figure S8 - DAS spectra from SVD analysis with the corresponding lifetimes of (a) bare CD, (b) CD@AgNP- and (c) CD@AgNP+ solutions.

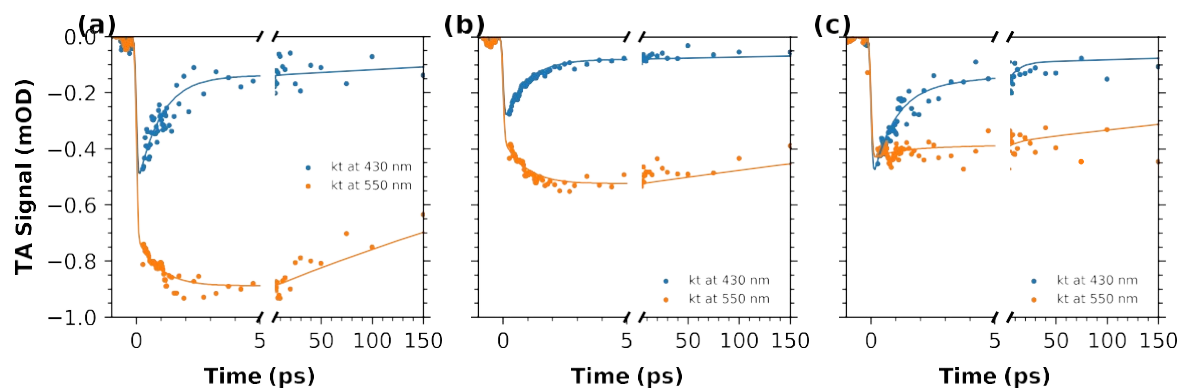

Figure S9 – Transient absorption time traces at 430 nm (blue) and 550 nm (orange), with the respective least-squares fitting curves (continuous lines) of CD (a), CD@AgNP- (b) and CD@AgNP- (c).
